# Supplementary material
Source: HighWire-hosted journal article supplement (https://bmjopenquality.bmj.com/highwire/filestream/145497/field_highwire_adjunct_files/1/bmjoq-2022-002084supp002_data_supplement.pdf)
Supplement: bmjoq-2022-002084supp002_data_supplement.pdf [file bmjoq-2022-002084supp002_data_supplement.pdf]

## Appendix 2

Five-level Likert scale for uniqueness

| Likert Scale |                                                                                              |
|--------------|----------------------------------------------------------------------------------------------|
| 1            | no new information was added; all information was known prior                                |
| 2            | limited new information was added; a majority of information was known prior                 |
| 3            | a mix of new and known information                                                           |
| 4            | a substantial proportion of new information added; a minority of information was known prior |
| 5            | completely novel information, no prior known information present                             |
